# Supplementary material for: A highly specific ‘turn-on’ fluorescent detection of Mg2+ through a xanthene based fluorescent molecular probe
Source: Royal Society of Chemistry journal article supplement (doi:10.1039/c5ra26531b), 2016-01-01

## Electronic Supplementary Information

### A highly specific 'Turn-On' fluorescent detection of $Mg^{2+}$ through a xanthene based fluorescent molecular probe

Abha Pandey, Ajit Kumar, Siddharth Vishwakarma, K. K. Upadhyay\*

Department of Chemistry (Centre of Advanced Study), Faculty of Science, Banaras Hindu University, Varanasi, Uttar Pradesh-221005, India.

\*Corresponding author: Tel: +91 542 670 2488

E-mail: drkaushalbhu@yahoo.co.in; kku@bhu.ac.in, Tel: +91-542-6702488

#### Table of Contents

| S No. | Figures           | Captions                                                | Page No.   |
|-------|-------------------|---------------------------------------------------------|------------|
| 1.    |                   | <b>Experimental section</b>                             | <b>3</b>   |
| 2.    | <b>Table S1</b>   | Crystal data and structure refinement for <b>B-XAN</b>  | <b>4-5</b> |
| 3.    | <b>Figure S1</b>  | IR spectrum of <b>B-XAN</b>                             | <b>6</b>   |
| 4.    | <b>Figure S2</b>  | $^1H$ NMR spectrum of <b>B-XAN</b> (in $CD_3CN$ )       | <b>7</b>   |
| 5.    | <b>Figure S3</b>  | $^{13}C$ NMR spectrum of <b>B-XAN</b> (in $DMSO-d_6$ )  | <b>8</b>   |
| 6.    | <b>Figure S4</b>  | ESI-MS spectrum of <b>B-XAN</b>                         | <b>9</b>   |
| 7.    | <b>Figure S5</b>  | IR spectrum of <b>N-XAN</b>                             | <b>10</b>  |
| 8.    | <b>Figure S6</b>  | $^1H$ NMR spectrum of <b>N-XAN</b> (in $DMSO-d_6$ )     | <b>11</b>  |
| 9.    | <b>Figure S7</b>  | $^{13}C$ NMR spectrum of <b>N-XAN</b> (in $DMSO-d_6$ )  | <b>12</b>  |
| 10.   | <b>Figure S8</b>  | ESI-MS spectrum of <b>N-XAN</b>                         | <b>13</b>  |
| 11.   | <b>Figure S9</b>  | IR spectrum of $(B-XAN)_2Mg$                            | <b>14</b>  |
| 12.   | <b>Figure S10</b> | $^1H$ NMR spectrum of $(B-XAN)_2Mg$ (in $CD_3CN$ )      | <b>15</b>  |
| 13.   | <b>Figure S11</b> | $^{13}C$ NMR spectrum of $(B-XAN)_2Mg$ (in $DMSO-d_6$ ) | <b>16</b>  |

## *Electronic Supplementary Information*

|     |                      |                                                                                                                                                                                                                                                                                                                                                                        |    |
|-----|----------------------|------------------------------------------------------------------------------------------------------------------------------------------------------------------------------------------------------------------------------------------------------------------------------------------------------------------------------------------------------------------------|----|
| 14. | <b>Figure S12</b>    | ESI-MS spectrum of (B-XAN) <sub>2</sub> Mg                                                                                                                                                                                                                                                                                                                             | 17 |
| 15. | <b>Figure S13(a)</b> | UV-visible Spectrum of <b>B-XAN</b> in presence of different metal ions (10 equiv.) at 10 μM in acetonitrile                                                                                                                                                                                                                                                           | 18 |
| 16. | <b>Figure S13(b)</b> | Photograph showing naked eye color change of <b>B-XAN</b> (under visible light) in presence of different metal ions in acetonitrile                                                                                                                                                                                                                                    | 18 |
| 17. | <b>Figure S14(a)</b> | UV-visible Spectrum of <b>N-XAN</b> with different metal ions (10 equiv.) at 10 μM in acetonitrile                                                                                                                                                                                                                                                                     | 19 |
| 18. | <b>Figure S14(b)</b> | Photograph showing naked eye colour change of <b>N-XAN</b> (under visible light) in presence of different metal ions in acetonitrile                                                                                                                                                                                                                                   | 19 |
| 19. | <b>Figure S15(a)</b> | Relative fluorescence changes of <b>N-XAN</b> (1.0 μM) after addition of 10 equiv. of various metal ions in acetonitrile at 458 nm along with inset fluorescence spectral graph                                                                                                                                                                                        | 20 |
| 20. | <b>Figure S15(b)</b> | Naked eye fluorescence response of <b>N-XAN</b> in the presence of different metal ions (under UV light of 365 nm)                                                                                                                                                                                                                                                     | 20 |
| 21. | <b>Figure S16</b>    | Fluorescence responses of <b>B-XAN</b> (1μM) at 458 nm in the presence of various metal ions in acetonitrile solution. The red bars represent the emission intensities of <b>B-XAN</b> in the presence of various metal ions (10.0 eq.). The blue bars represent the change of emission upon subsequent addition of Mg <sup>2+</sup> (10.0 eq.) to the above solutions | 21 |
| 22. | <b>Figure S17</b>    | Calibration curve for determination of detection limit of <b>B-XAN</b> for Mg <sup>2+</sup> by fluorescence titration data                                                                                                                                                                                                                                             | 22 |
| 23. | <b>Figure S18</b>    | Job's Plot between <b>B-XAN</b> and Mg <sup>2+</sup> showing 2:1 binding stoichiometry                                                                                                                                                                                                                                                                                 | 23 |
| 24. | <b>Figure S19</b>    | Reaction-time profile of <b>B-XAN</b> in presence of Mg <sup>2+</sup>                                                                                                                                                                                                                                                                                                  | 24 |
| 25. | <b>Figure S20</b>    | Fluorescence emission spectra showing reversibility of <b>B-XAN</b> in the presence of Mg <sup>2+</sup> and EDTA in acetonitrile solution                                                                                                                                                                                                                              | 25 |
| 26. | <b>Figure S21</b>    | Non-linear fit plot of fluorescence titration data for determination of binding constants.                                                                                                                                                                                                                                                                             | 26 |

## *Electronic Supplementary Information*

### **EXPERIMENTAL SECTION**

#### **Instrumentation:**

The IR Spectra for the **B-XAN**, **N-XAN** and **(B-XAN)<sub>2</sub>Mg** were recorded on JASCO-FTIR Spectrophotometer while <sup>1</sup>H NMR spectra were recorded on JEOL AL 300 FT NMR Spectrometer Mass spectrometric analysis was carried out on a Bruker Compass data analysis spectrometer. Electronic spectra were recorded at room temperature (298 K) on a UV-1800 pharماسpec spectrophotometer with quartz cuvette (path length=1 cm). Emission spectra were recorded on Varian Cary Eclipse Fluorescence spectrophotometer and JY HORIBA Fluorescence spectrophotometer. The <sup>1</sup>H NMR spectra were recorded by using tetramethylsilane (TMS) as an internal reference standard.

#### **Materials and methods:**

All reagents for synthesis were purchased from Sigma-Aldrich and were used without any further purification. All titration experiments were carried at room temperature. All the cations were used as their chloride salts. The <sup>1</sup>H NMR spectra were recorded by using tetramethylsilane (TMS) as an internal reference standard.

#### **X-ray crystallographic studies:**

Single crystal X-ray diffraction measurements were carried out on an Oxford Diffraction Xcalibur system with a Ruby CCD detector. All the determinations of unit cell and intensity data were performed with graphite-mono-chromated Mo-K $\alpha$  radiation ( $\lambda = 0.71073 \text{ \AA}$ ). Data for the ligand and metal complex were collected at room temperature. The structures were solved by direct methods, using Fourier techniques, and refined by full-matrix least-squares on F2 using the SHELXTL-97 program package [1]. Crystal data and details of the structure determination for ligand and complex are summarized in Table 1. **CCDC 1059288** contains the supplementary crystallographic data for this paper. These data can be obtained free of charge from the Cambridge Crystallographic Data Centre via <http://www.ccdc.cam.ac.uk/cgi-bin/catreq.cgi>.

#### **References:**

1. (a) G. M. Sheldrick, SHELXL-97, Program for X-ray Crystal Structure Refinement, Göttingen University, Göttingen, Germany, 1997; (b) G. M. Sheldrick, SHELXS-97, Program for X-ray Crystal Structure Solution, Göttingen University, Göttingen, Germany, 1997.

## Electronic Supplementary Information

**Table 1:** Crystal data and details of the structure determination of **B-XAN**:

| Identification code             | B-XAN                                                                                                |
|---------------------------------|------------------------------------------------------------------------------------------------------|
| CCDC No.                        | CCDC 1059288                                                                                         |
| Empirical formula               | C <sub>21</sub> H <sub>16</sub> N <sub>2</sub> O <sub>3</sub>                                        |
| Formula weight                  | 344.36                                                                                               |
| Temperature                     | 293(2) K                                                                                             |
| Wavelength                      | 0.71073Å                                                                                             |
| Crystal system                  | Monoclinic                                                                                           |
| space group                     | P21/c                                                                                                |
| Unit cell dimensions            | a=16.7245(10)Å , alpha=90deg.<br>b=11.3341(6) Å, beta=105.028(5) deg.<br>c=9.6962(5) Å, gamma=90deg. |
| Volume                          | 1775.12(17) Å <sup>3</sup>                                                                           |
| Z                               | 4                                                                                                    |
| Density (calculated)            | 1.288 mg/m <sup>3</sup>                                                                              |
| Absorption coefficient          | 0.087 mm <sup>-1</sup>                                                                               |
| F(000)                          | 720.0                                                                                                |
| Crystal size                    | 0.028 x 0.023 x 0.016 mm                                                                             |
| Crystal color and habit         | Colourless, needle                                                                                   |
| Diffractionmeter                | 'Xcalibur, Eos'                                                                                      |
| Theta range for data collection | 3.31 to 29.16 deg.                                                                                   |
| Limiting indices                | -22<=h<=22, -9<=k<=15, -12<=l<=13                                                                    |
| Reflections collected / unique  | 8177 / 4800 [R(int) = 0.0196]                                                                        |
| Completeness to theta = 25.00   | 99.8 %                                                                                               |
| Absorption correction           | Semi-empirical from equivalents                                                                      |
| Refinement method               | Full-matrix least-squares on F <sup>2</sup>                                                          |
| Max. and min. transmission      | 1.00000 and 0.93478                                                                                  |
| Data / restraints / parameters  | 4034 / 0 / 236                                                                                       |

### *Electronic Supplementary Information*

|                                      |                                    |
|--------------------------------------|------------------------------------|
| Goodness-of-fit on $F^2$             | 1.053                              |
| Final R indices [ $I > 2\sigma(I)$ ] | R1 = 0.0515, wR2 = 0.1104          |
| R indices (all data)                 | R1 = 0.0856, wR2 = 0.1321          |
| Largest diff. peak and hole          | 0.170 and -0.218 e.Å <sup>-3</sup> |

## Electronic Supplementary Information

Figure S1: IR spectrum of B-XAN

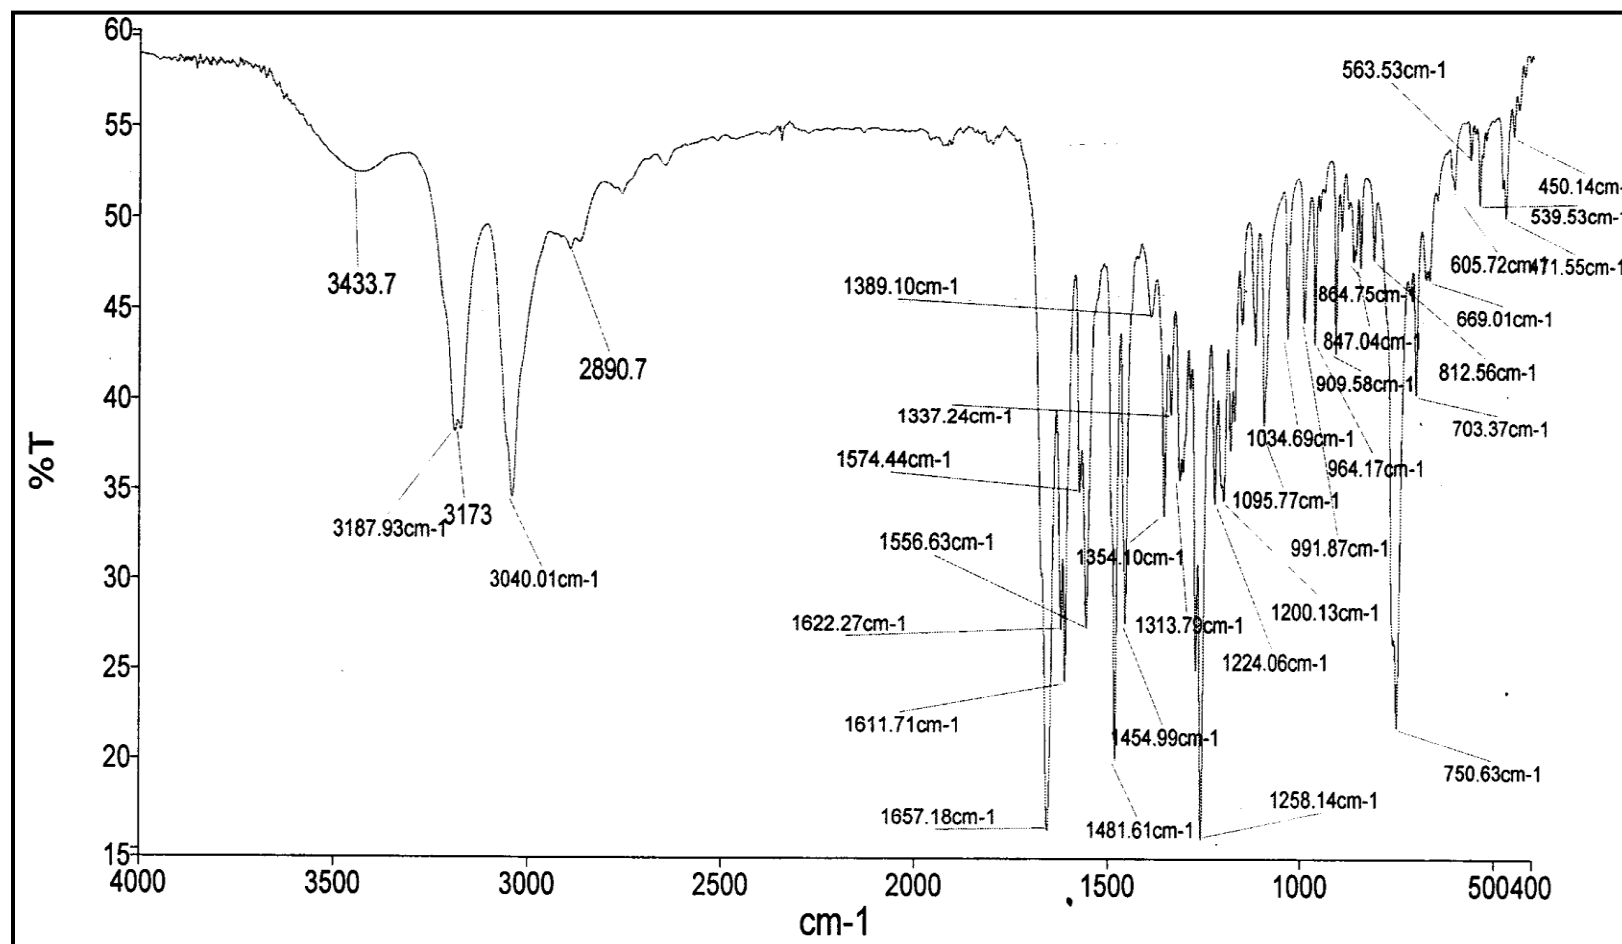

*Electronic Supplementary Information*

**Figure S2:**  $^1\text{H}$  NMR spectrum of **B-XAN** (in  $\text{CD}_3\text{CN}$ )

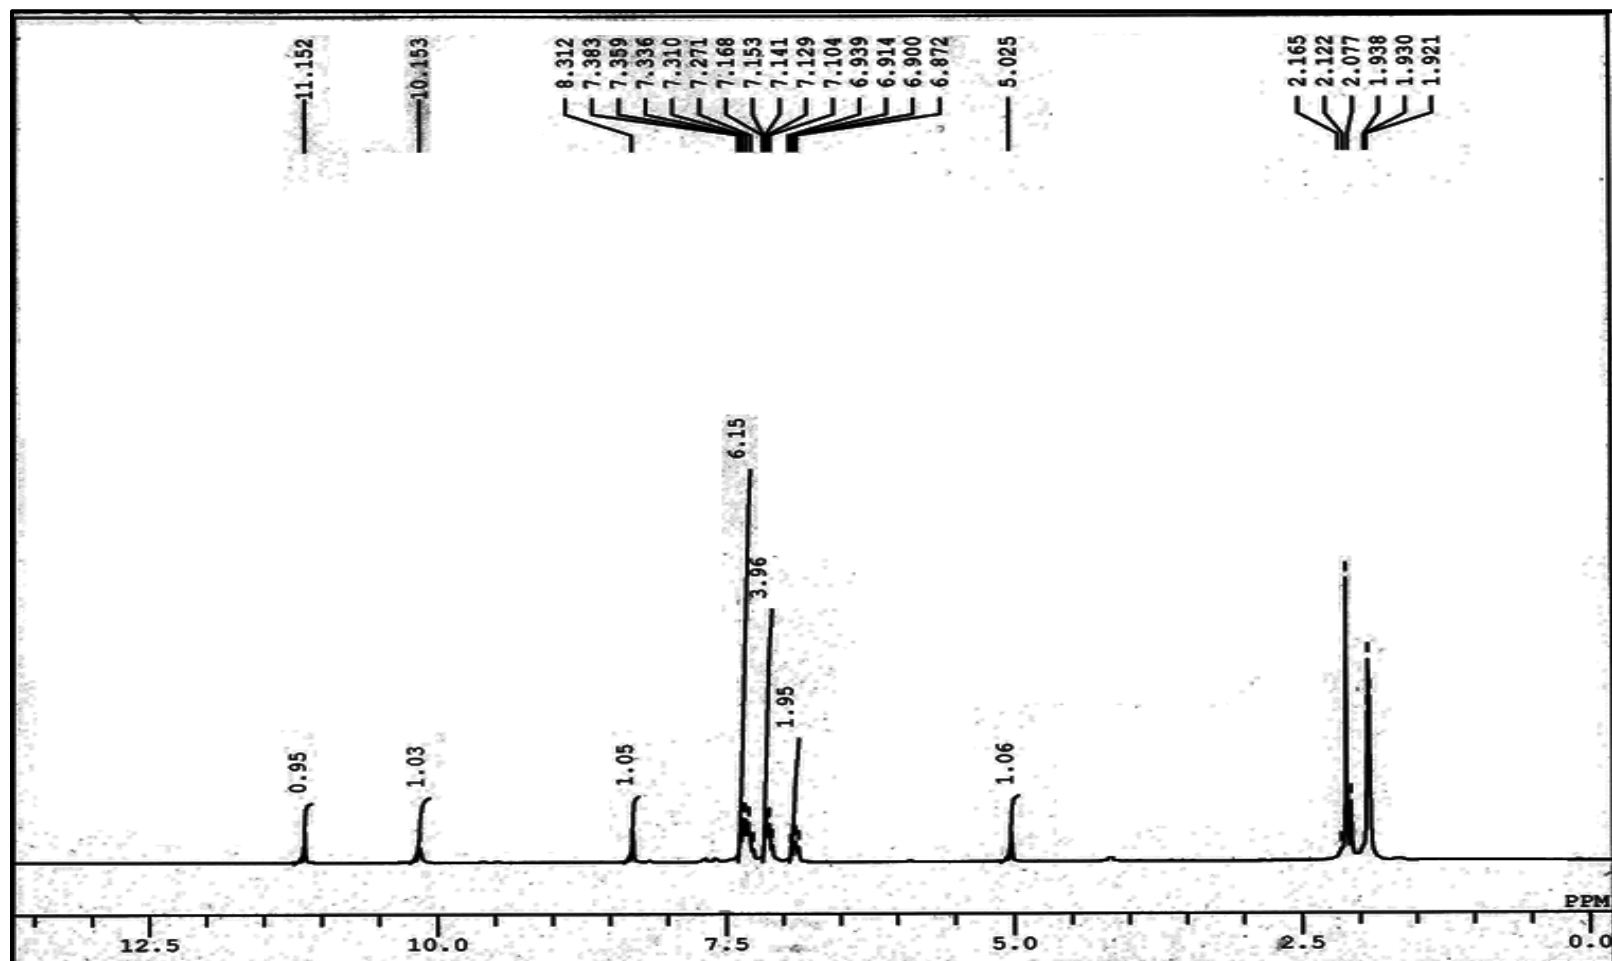

*Electronic Supplementary Information*

**Figure S3:**  $^{13}\text{C}$  NMR spectrum of **B-XAN** (in  $\text{DMSO-}d_6$ )

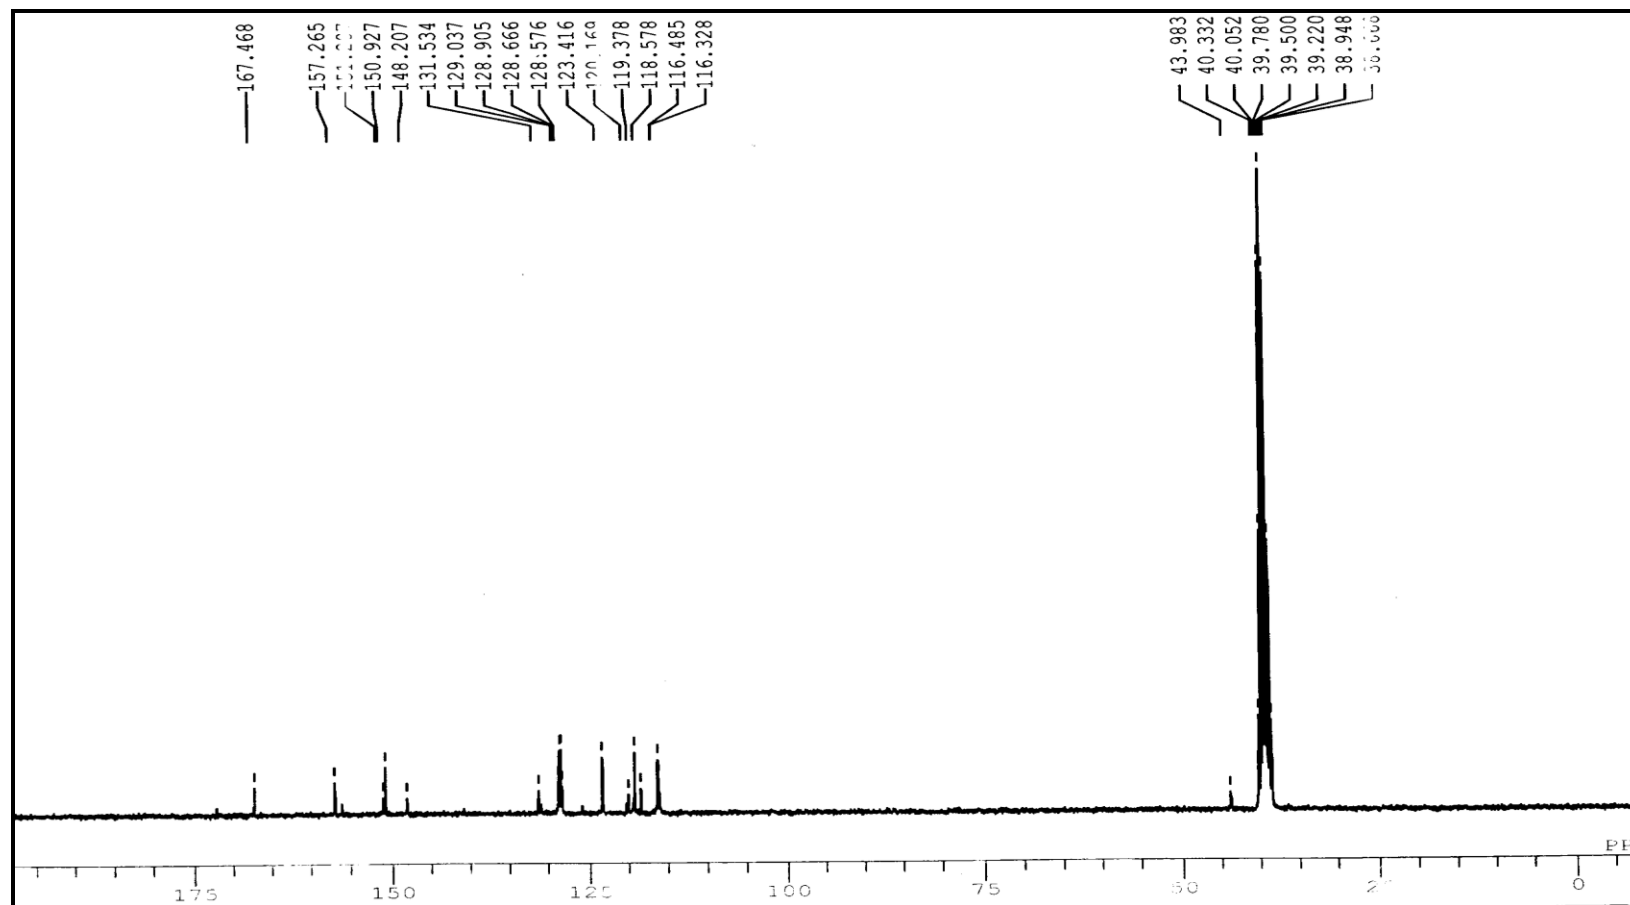



## Electronic Supplementary Information

Figure S4: ESI-MS spectrum of B-XAN

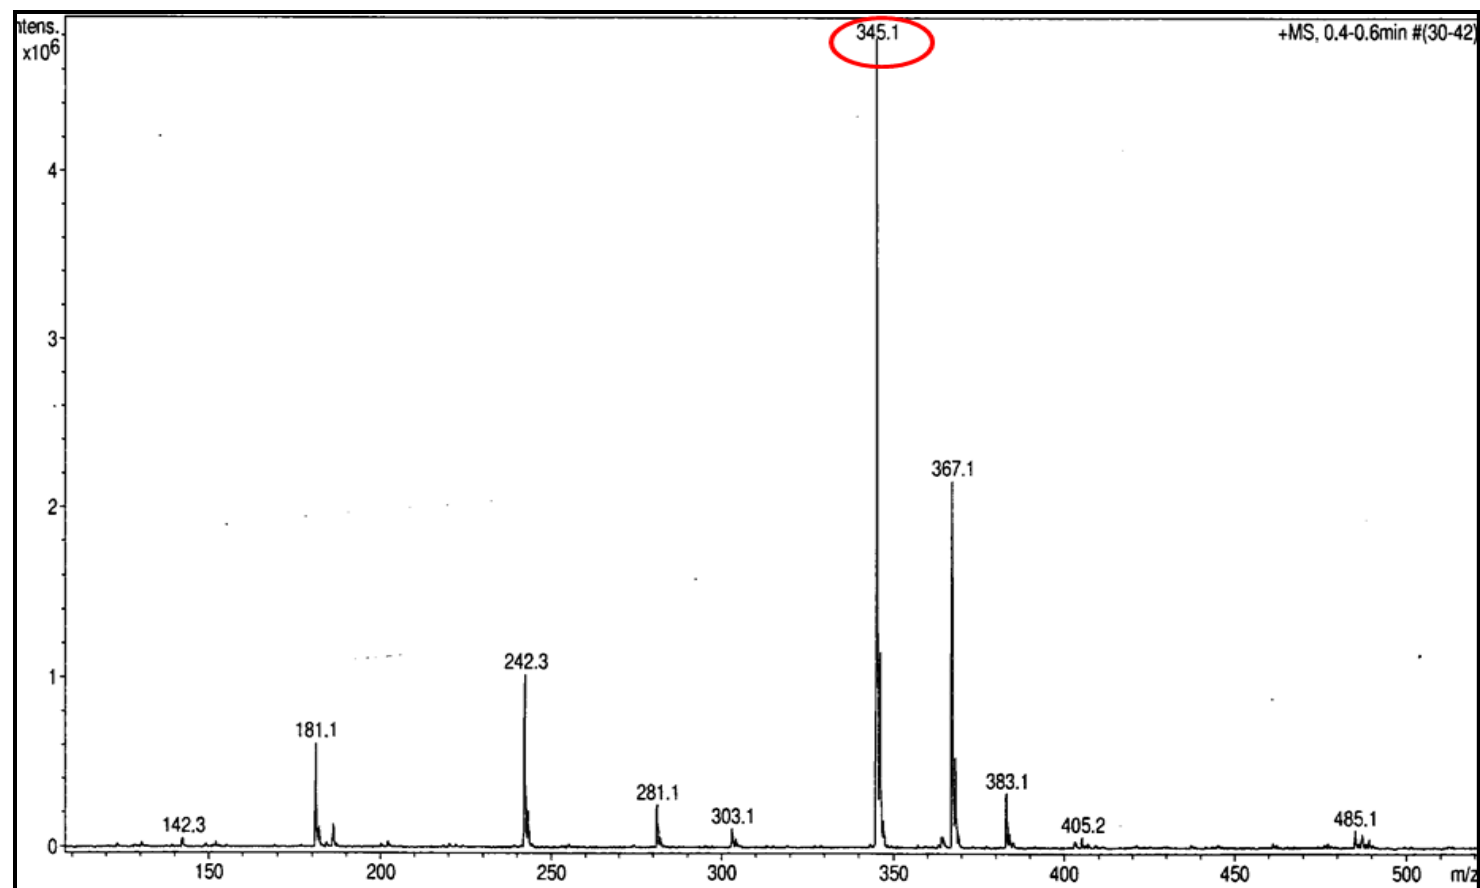

# Electronic Supplementary Information

Figure S5: IR spectrum of N-XAN

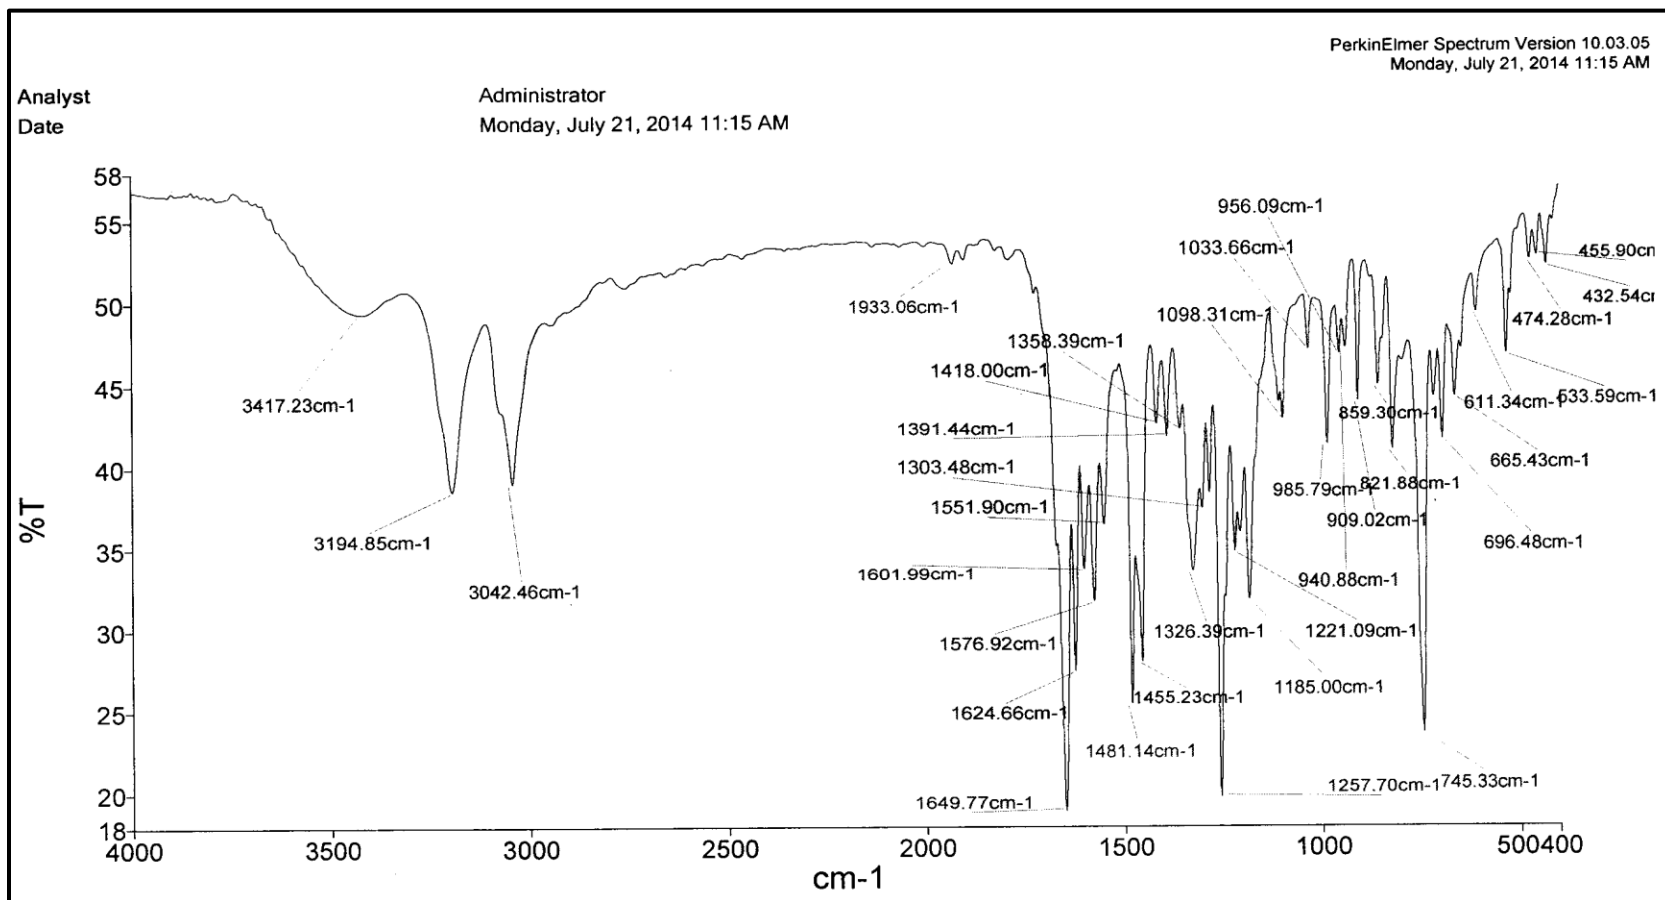

*Electronic Supplementary Information*

**Figure S6:**  $^1\text{H}$  NMR spectrum of N-XAN (in  $\text{DMSO}-d_6$ )

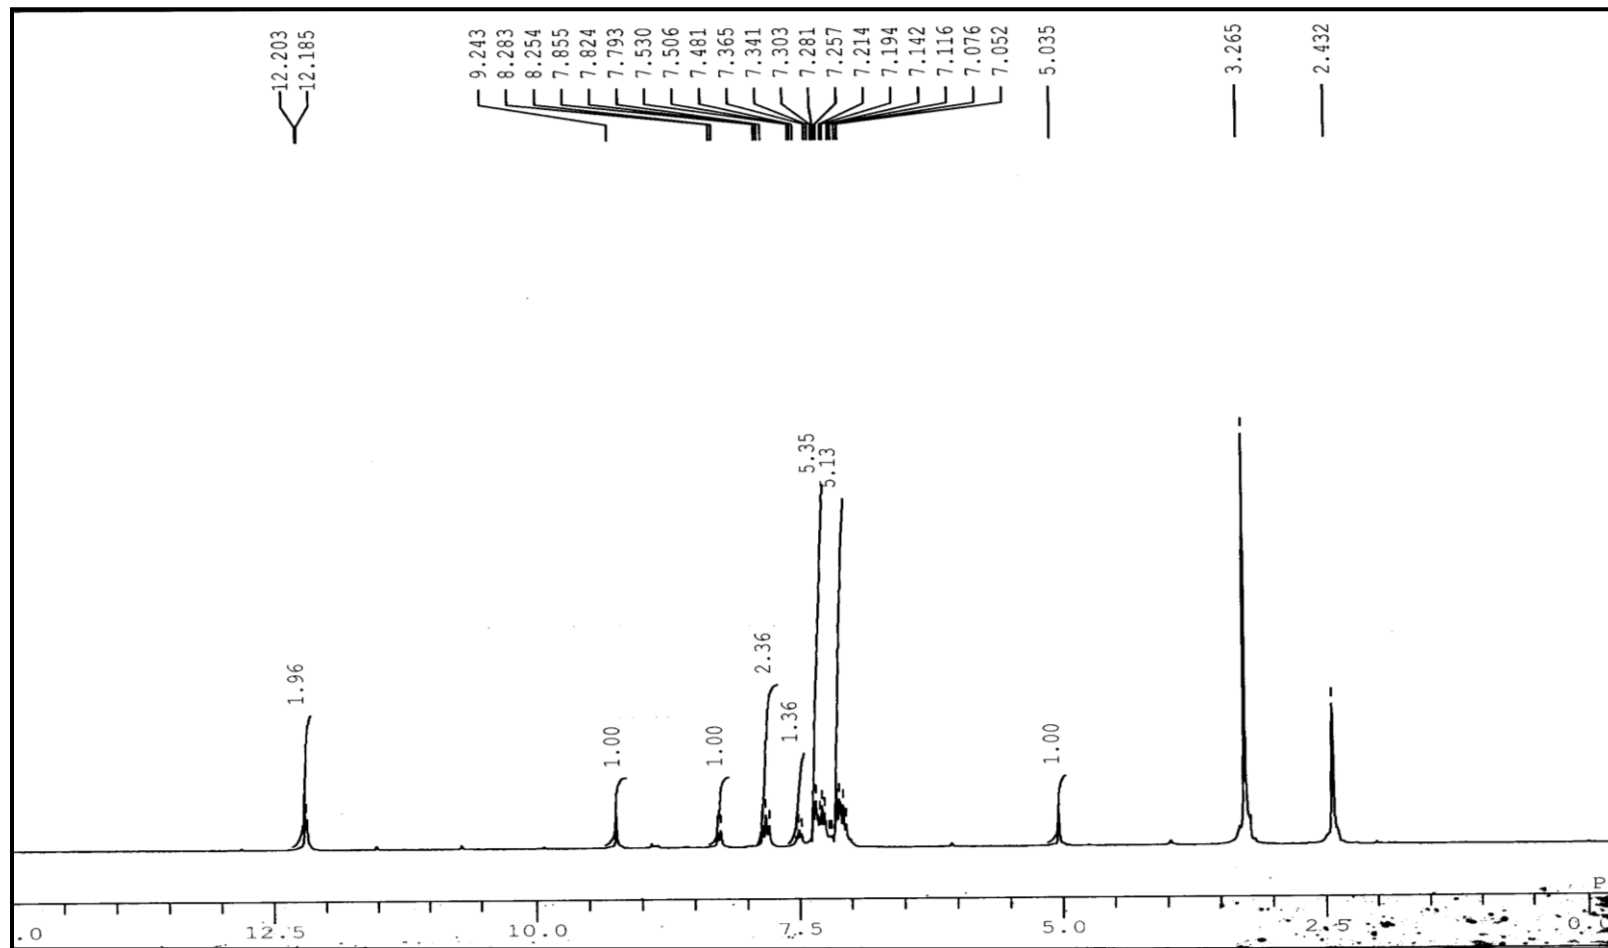

## Electronic Supplementary Information

Figure S7:  $^{13}\text{C}$  NMR spectrum of N-XAN (in  $\text{DMSO-}d_6$ )

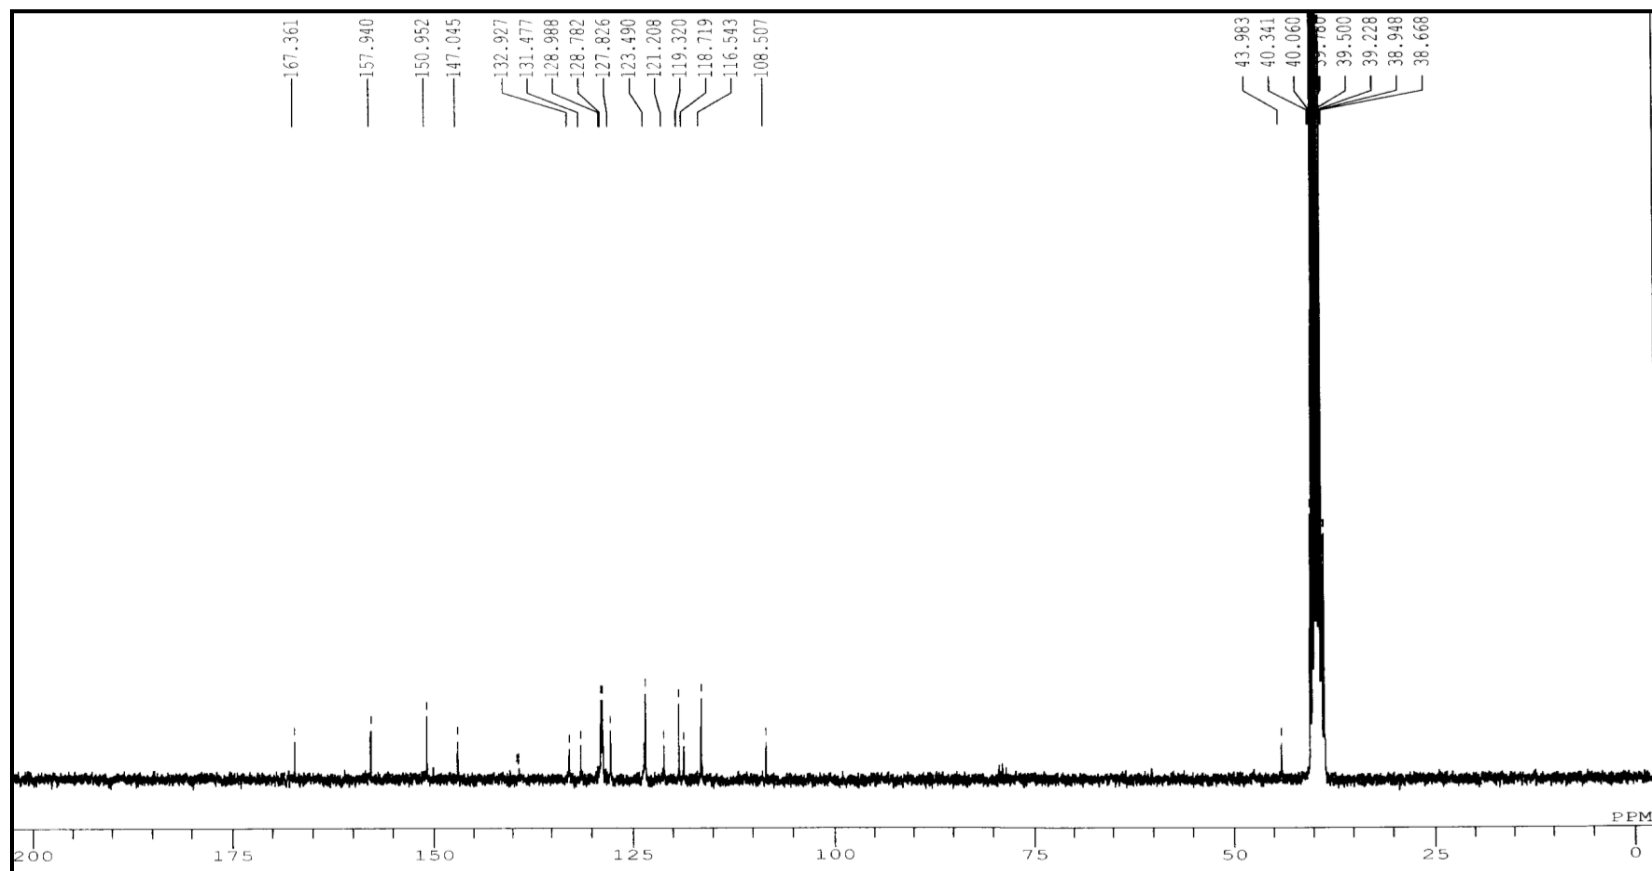

*Electronic Supplementary Information*

**Figure S8:** ESI-MS spectrum of N-XAN

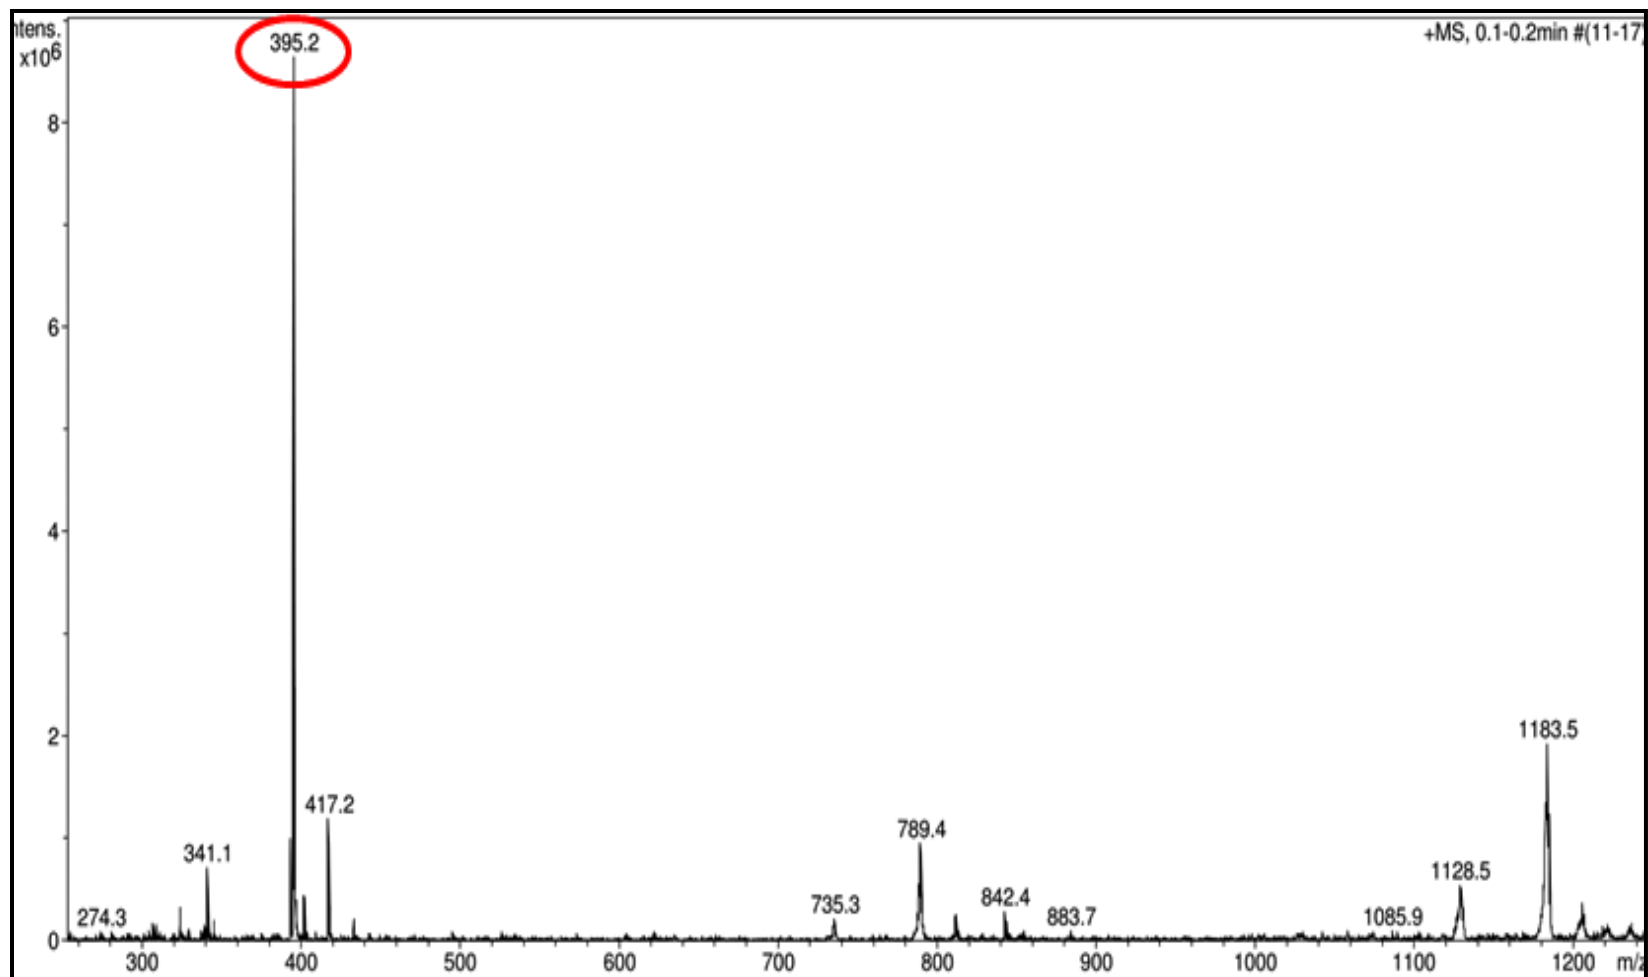

## Electronic Supplementary Information

Figure S9: IR spectrum of (B-XAN)<sub>2</sub>Mg

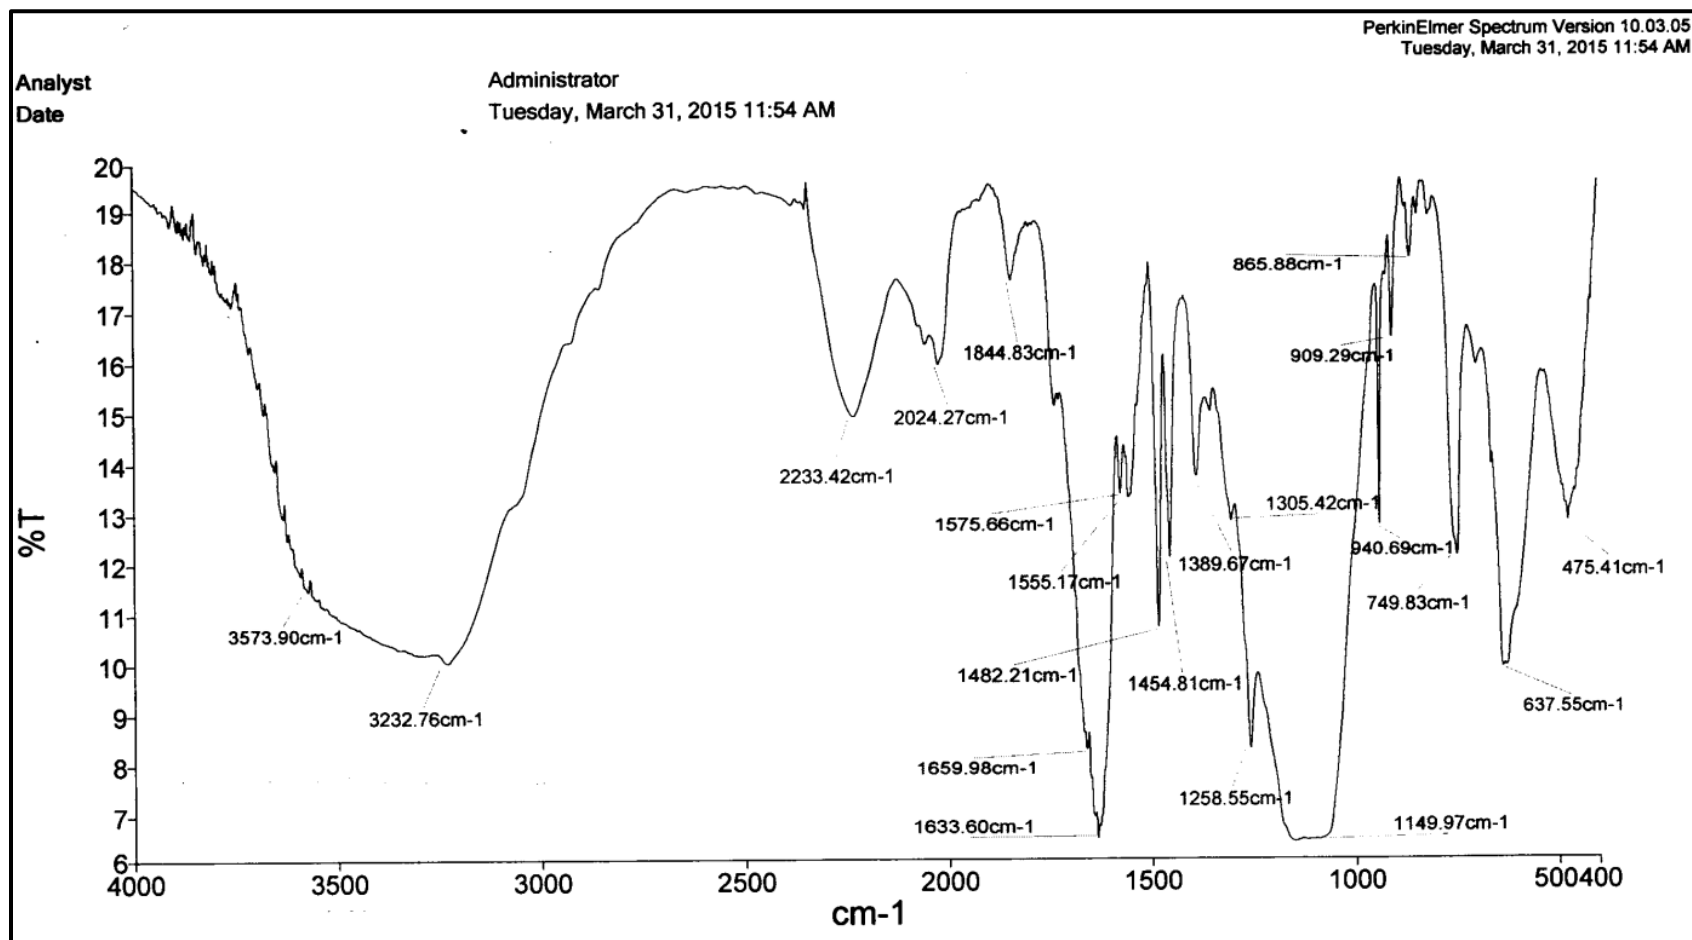

*Electronic Supplementary Information*

**Figure S10:**  $^1\text{H}$  NMR spectrum of  $(\text{B-XAN})_2\text{Mg}$  (in  $\text{CD}_3\text{CN}$ )

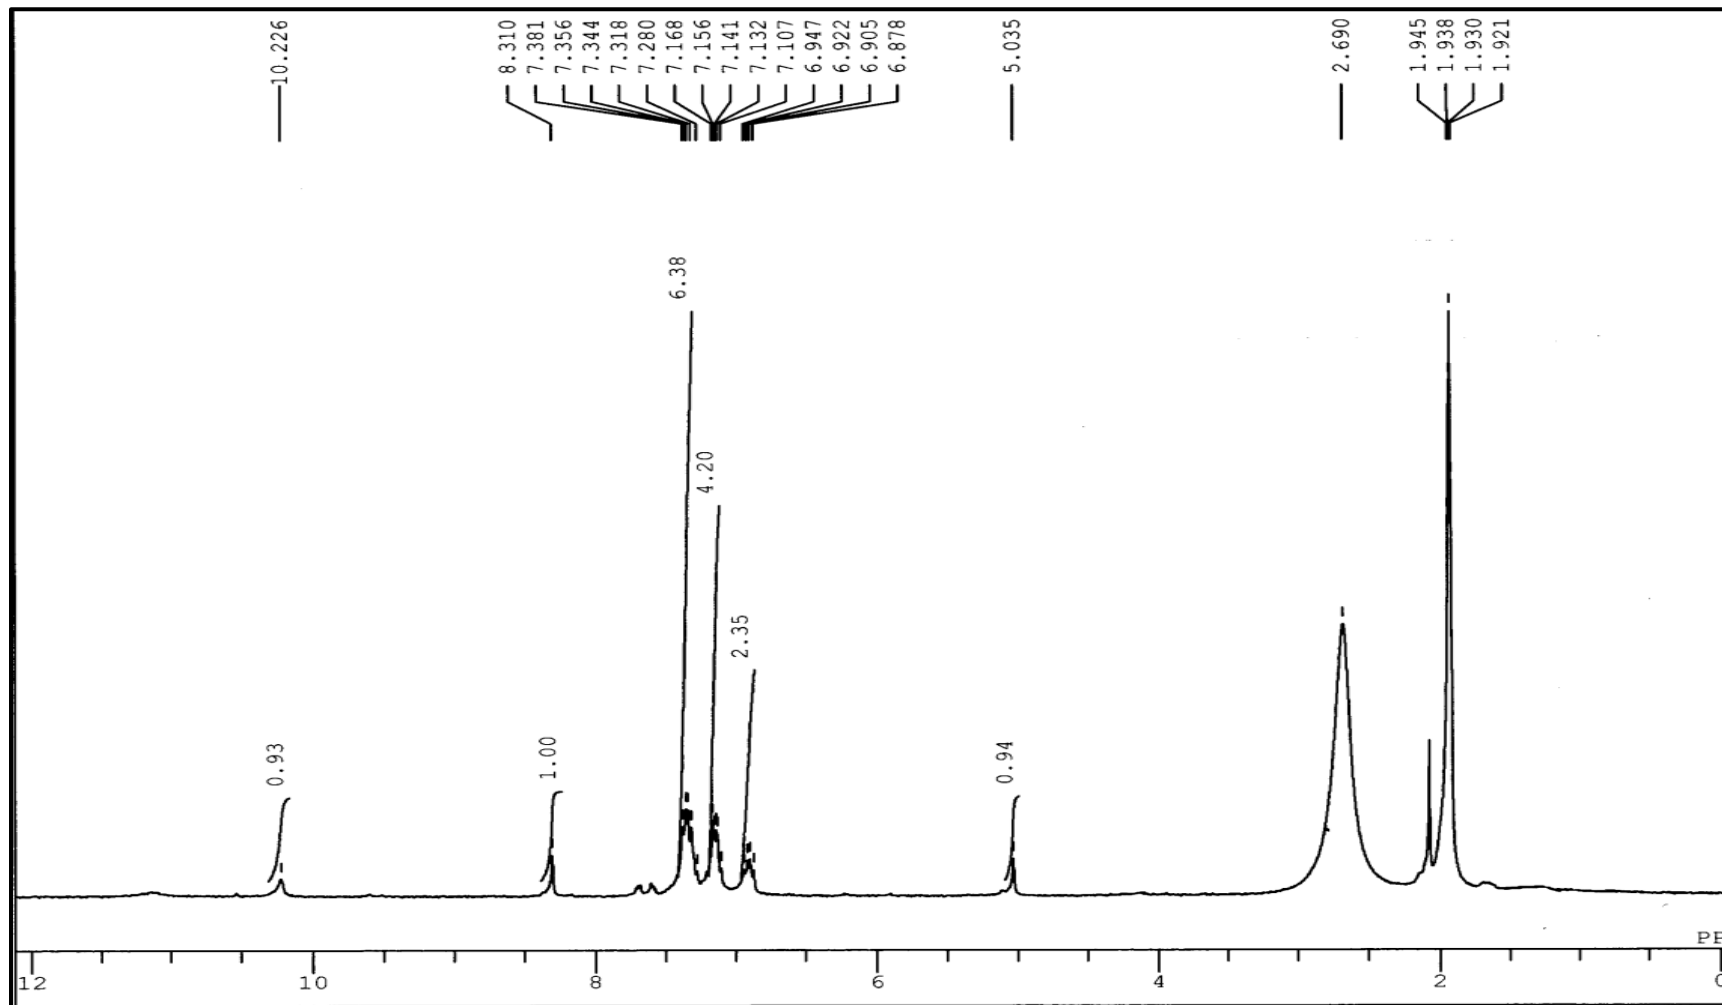

## Electronic Supplementary Information

**Figure S11:**  $^{13}\text{C}$  NMR spectrum of  $(\text{B-XAN})_2\text{Mg}$  (in  $\text{DMSO-}d_6$ )

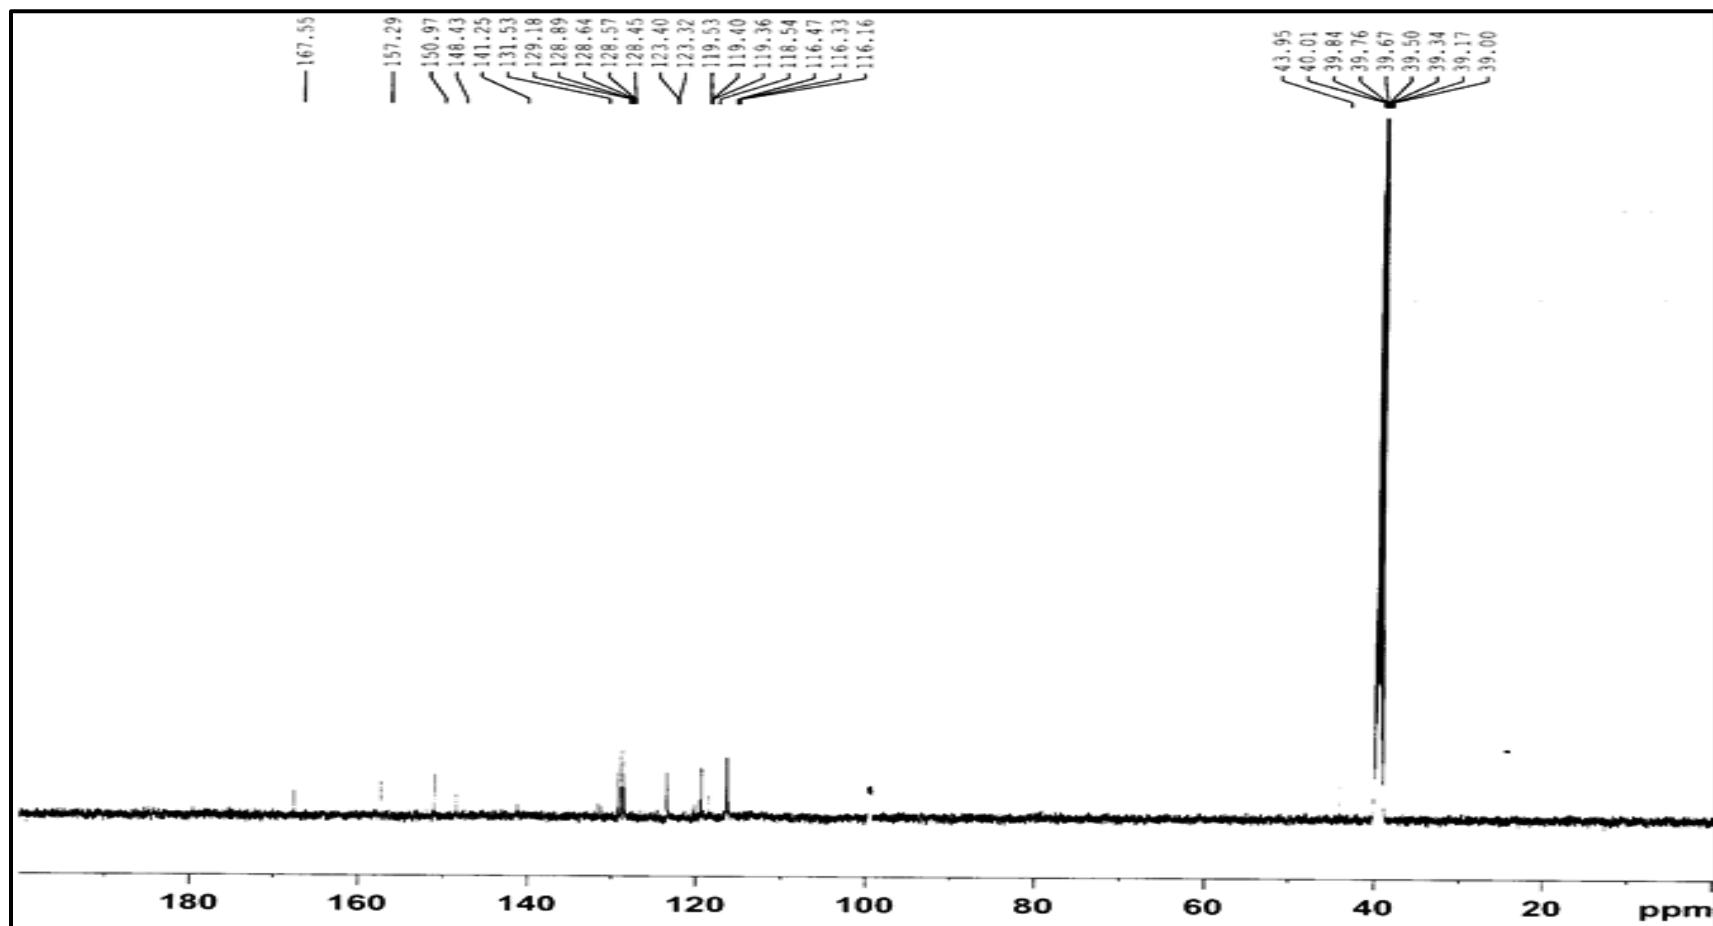



*Electronic Supplementary Information*

**Figure S12:** Mass spectrum of (B-XAN)<sub>2</sub>Mg

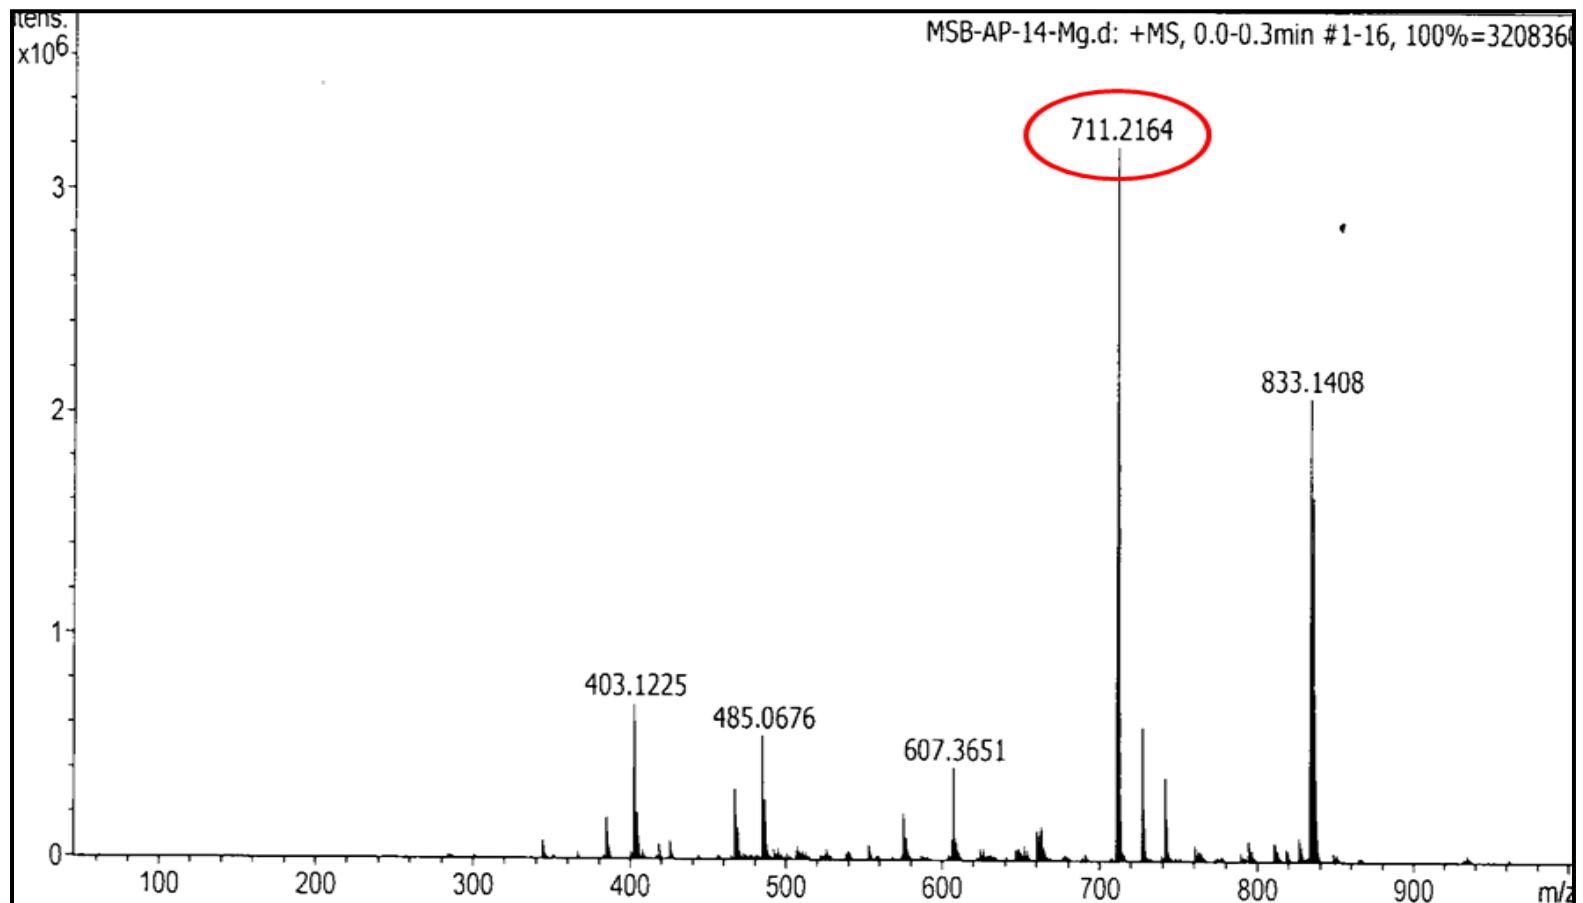

## Electronic Supplementary Information

**Figure S13 (a):** UV-visible spectrum of **B-XAN** with different metal ions (10 equiv.) at 10  $\mu\text{M}$  in acetonitrile

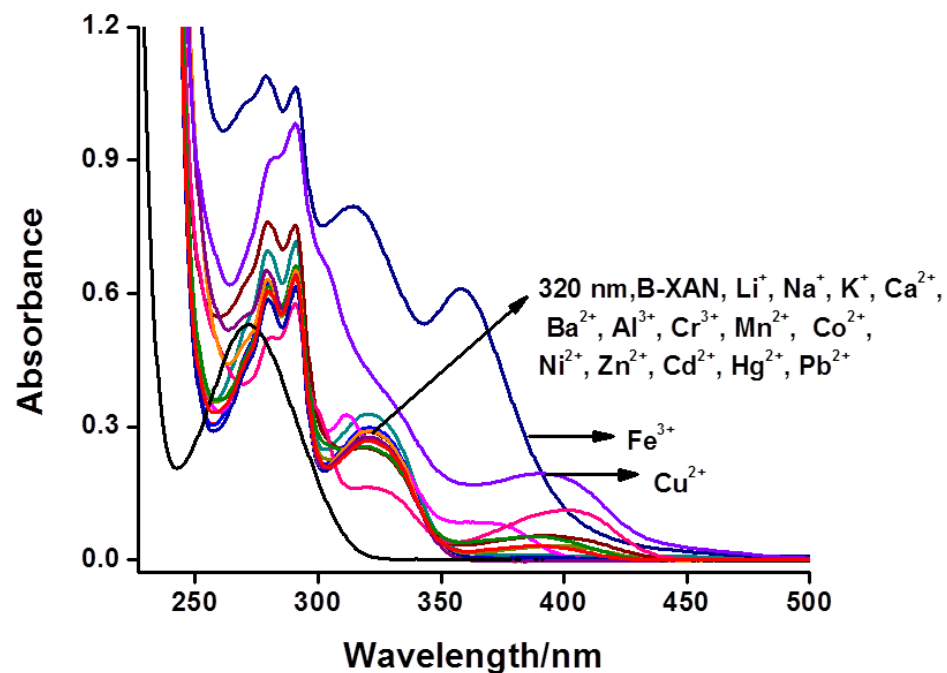

**Figure S13 (b):** Photograph showing naked eye color change of **B-XAN** (under visible light) in presence of different metal ions in acetonitrile

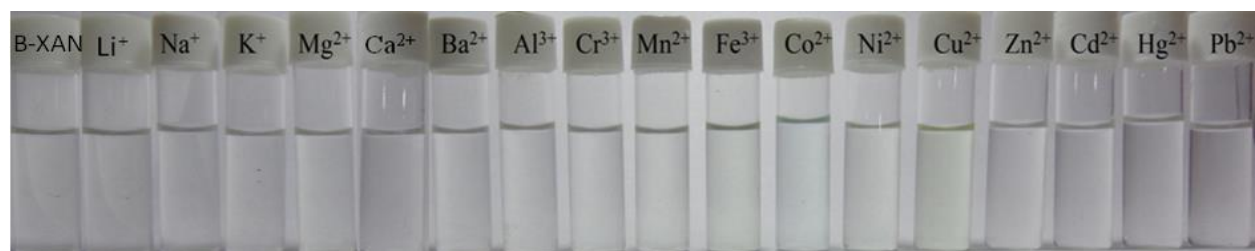

## Electronic Supplementary Information

**Figure S14 (a):** UV-visible spectrum of N-XAN with different metal ions (10 equiv.) at 10  $\mu\text{M}$  in acetonitrile

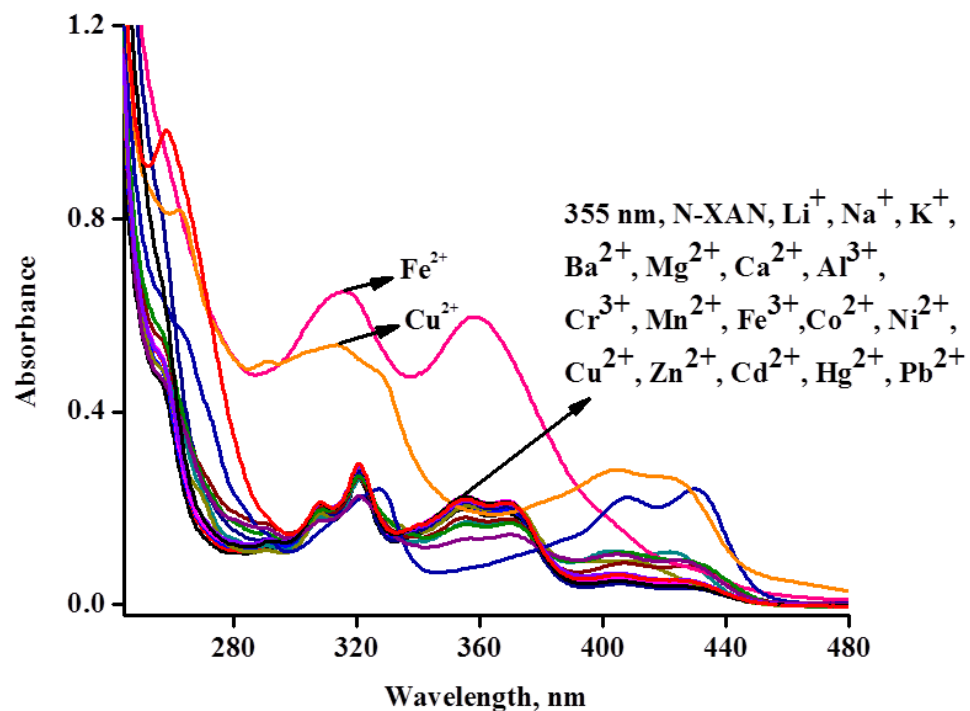

**Figure S14 (b):** Photograph showing naked eye colour change of N-XAN (under visible light) in presence of different metal ions in acetonitrile

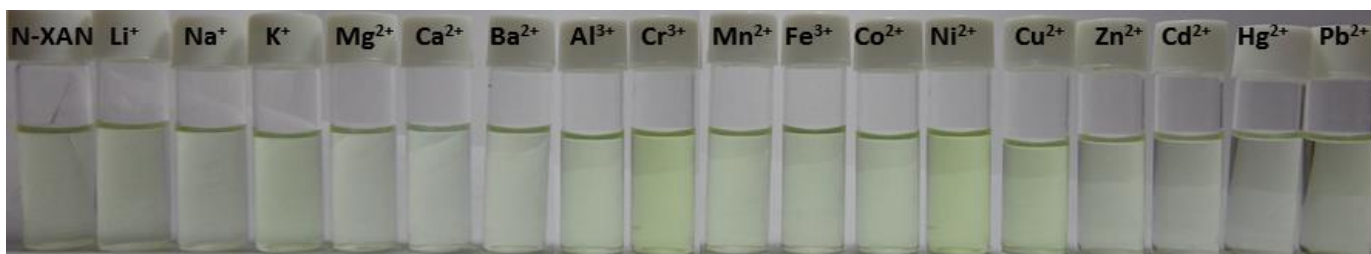

## Electronic Supplementary Information

**Figure S15 (a):** Relative fluorescence changes of N-XAN (1.0  $\mu\text{M}$ ) after addition of 10 equiv. of various metal ions in acetonitrile at 458 nm along with inset fluorescence spectral graph.

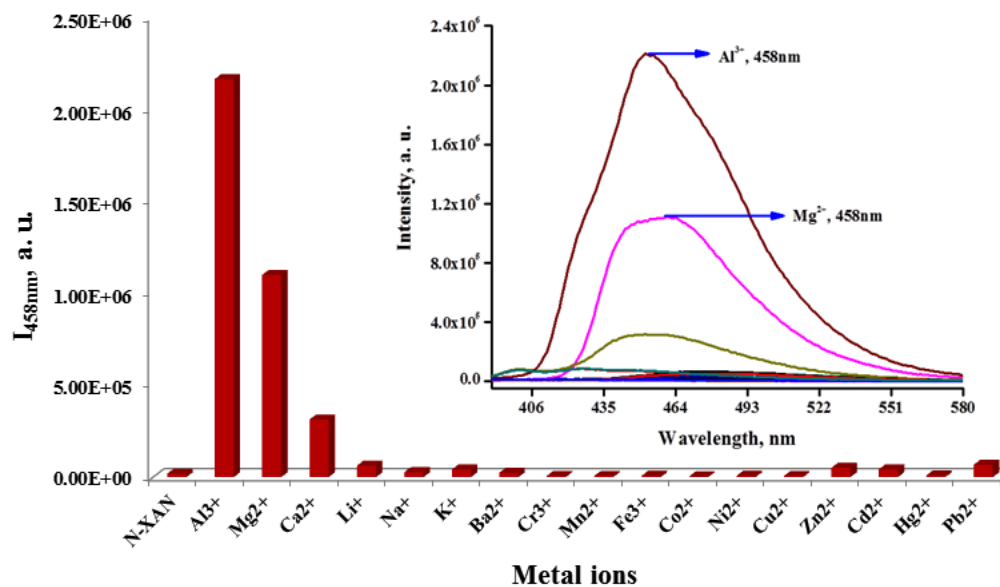

**Figure S15 (b):** Naked eye fluorescence response of N-XAN in the presence of different metal ions (under UV light of 365 nm)

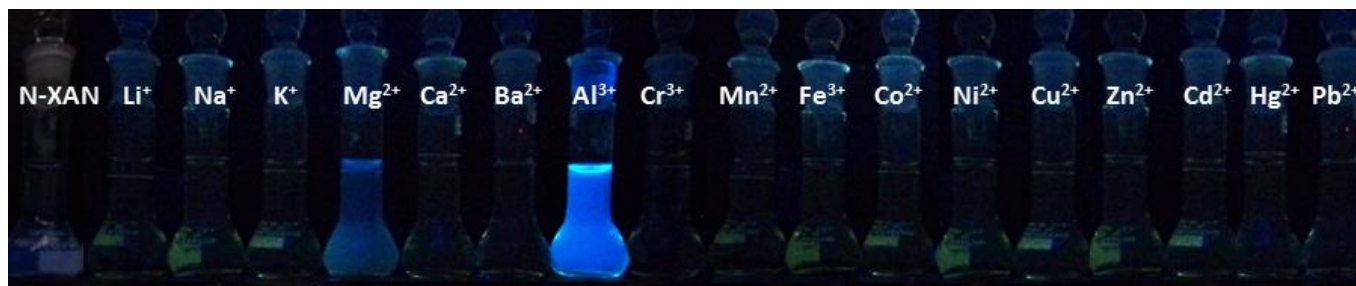

### *Electronic Supplementary Information*

**Figure S16:** Fluorescence responses of **B-XAN** ( $1\mu\text{M}$ ) at  $\lambda_{\text{ex}}=458\text{ nm}$  in the presence of various cations in acetonitrile solution. The red bars represent the emission intensities of **B-XAN** in the presence of various cations (10.0 eq.). The blue bars represent the change of emission upon subsequent addition of  $\text{Mg}^{2+}$  (10.0 eq.) to the above solution.

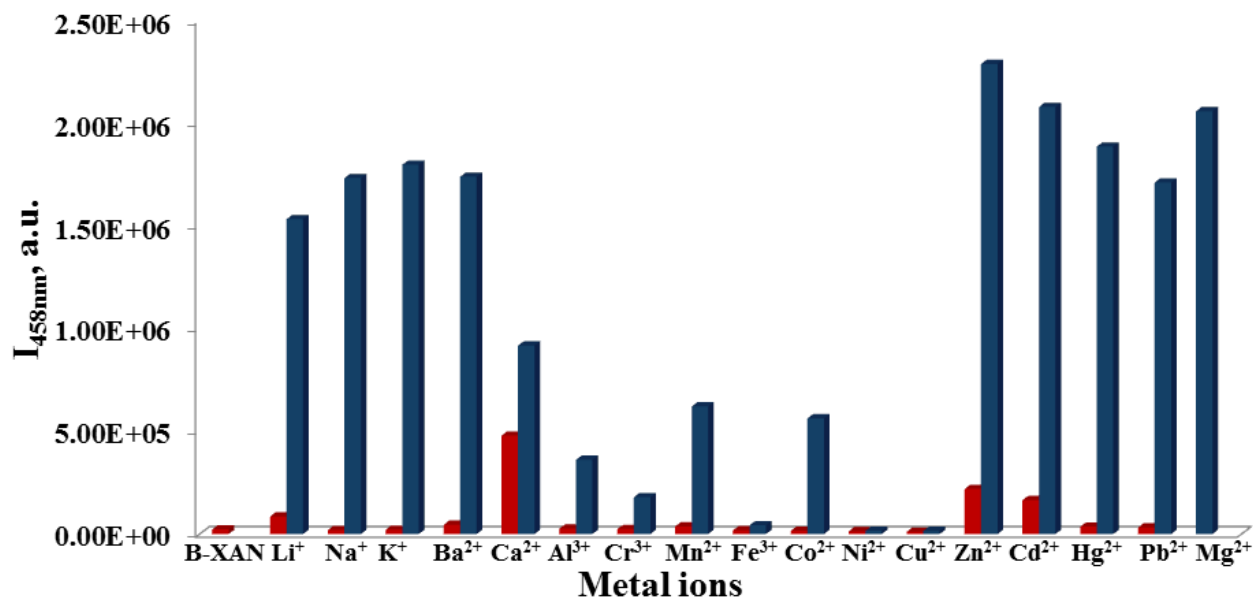

## Electronic Supplementary Information

**Figure S17:** Calibration curve for determination of detection limit of **B-XAN** for  $\text{Mg}^{2+}$  by fluorescence titration data

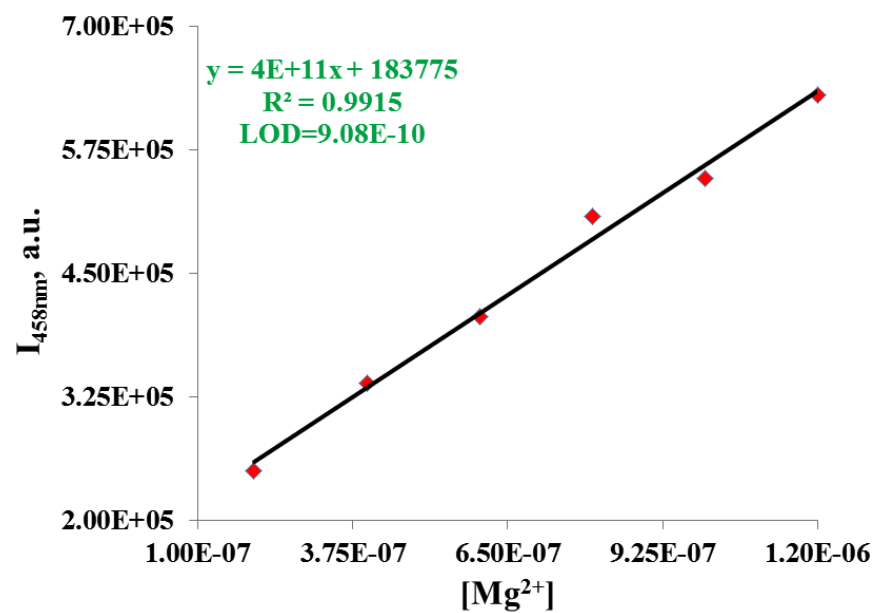

## Electronic Supplementary Information

**Figure S18:** Job's Plot between B-XAN and  $\text{Mg}^{2+}$  showing 2:1 binding stoichiometry

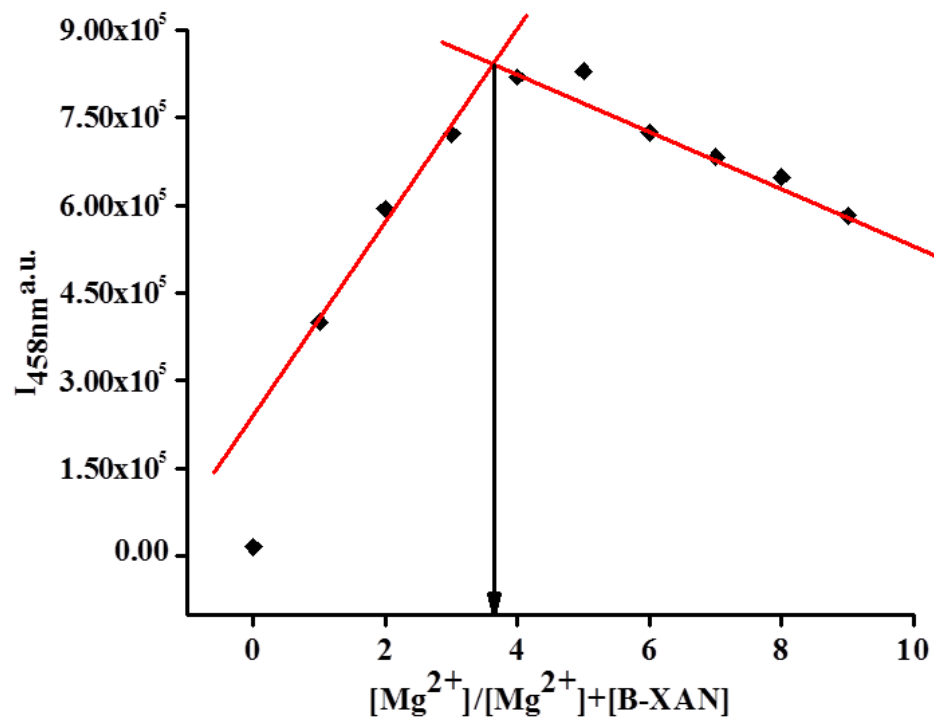

*Electronic Supplementary Information*

**Figure S19:** Reaction-time profile of **B-XAN** in presence of  $Mg^{2+}$

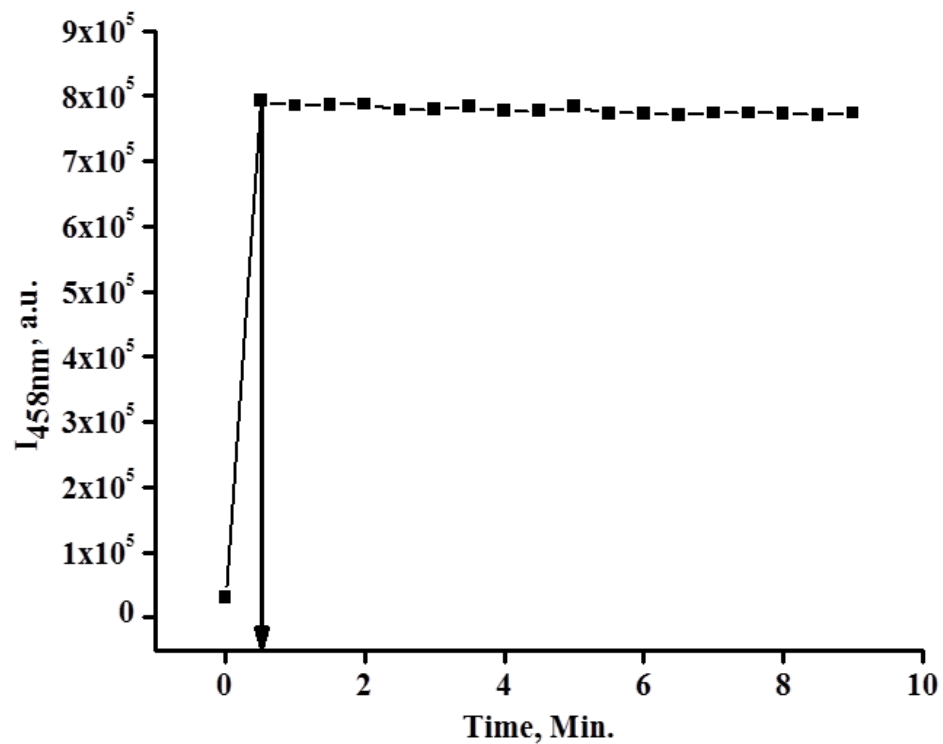



## Electronic Supplementary Information

**Figure S20:** Fluorescence emission spectra showing reversibility of **B-XAN** in the presence of  $\text{Mg}^{2+}$  and EDTA in acetonitrile solution

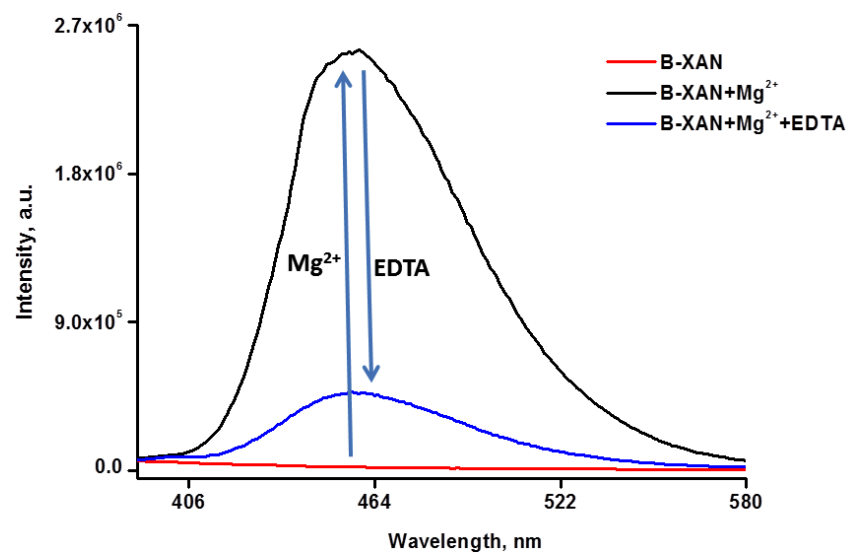

## Electronic Supplementary Information

**Figure S21:** Non-linear fit plot of fluorescence titration data for determination of binding constants

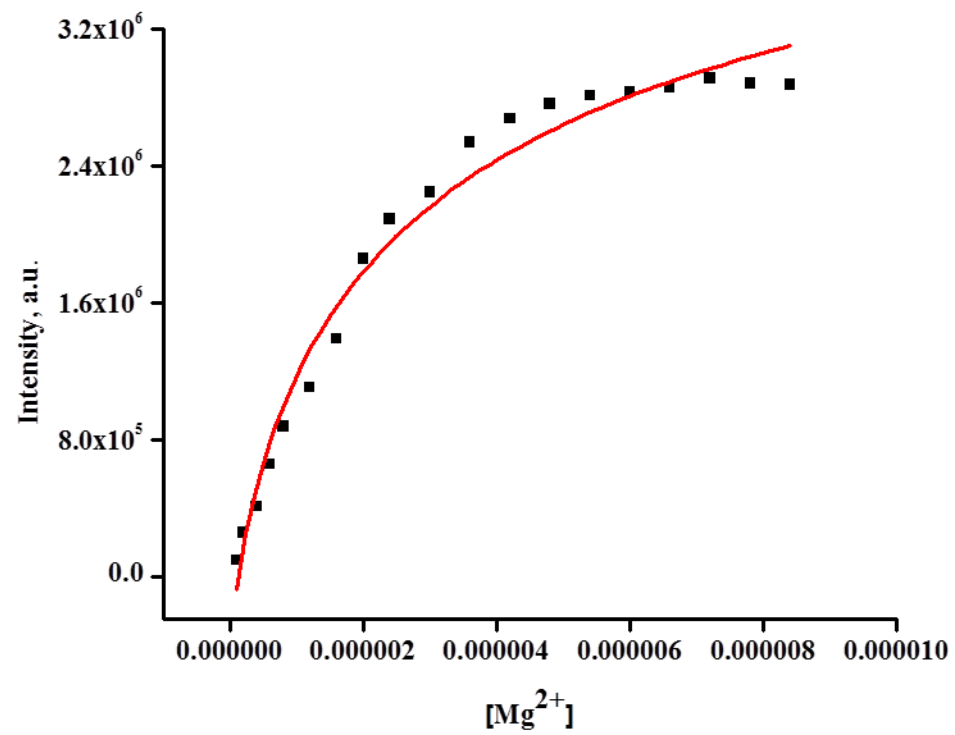

Supplement: c5ra26531b1.pdf [file c5ra26531b1.pdf]
